# Supplementary material for: Mechanism and catalytic activity of the water–gas shift reaction on a single-atom alloy Al1/Cu (111) surface
Source: Royal Society of Chemistry journal article supplement (doi:10.1039/d4nr03732d), 2024-12-17
Supplement: d4nr03732d1.pdf [file d4nr03732d1.pdf]

## Supporting Information

### Water Gas Shift Reaction Mechanism and Activity on Single Atom Alloy Al<sub>1</sub>/Cu (111) Surface

Yun Bai, Dongxu Tian\*

School of Chemistry, Dalian University of Technology, No.2 Linggong Road, Dalian City, Liaoning  
Province, P. R. China, 116024

Table S1. H<sub>2</sub>O adsorption and dissociation data on M<sub>1</sub>/Cu (111) (M = Ga, Al, Be and Cu) surfaces.

|                                   | Cu (111) | Ga <sub>1</sub> /Cu (111) | Al <sub>1</sub> /Cu (111) | Be <sub>1</sub> /Cu (111) |
|-----------------------------------|----------|---------------------------|---------------------------|---------------------------|
| $E_{\text{ads-H}_2\text{O}}$ (eV) | -0.43    | -0.29                     | -0.58                     | -0.63                     |
| $d_{\text{HO-H-IS}}$ (Å)          | 0.98     | 0.98                      | 1.01                      | 0.99                      |
| $\theta_{(\text{H-O-H})}$ (°)     | 104.86   | 104.64                    | 116.57                    | 107.28                    |
| $d_{\text{HO-H-TS}}$ (Å)          | 1.48     | 1.53                      | 1.40                      | 1.38                      |
| $\Delta E_a$ (eV)                 | 1.13     | 1.07                      | 0.67                      | 0.51                      |
| Freq (cm <sup>-1</sup> )          | 1263.29i | 1044.65i                  | 1177.69i                  | 1206.93i                  |

Table S2. The reaction mechanism and the RDS and reaction energy barrier for WGS on representative catalysts.

| System                                                         | Mechanism | RDS                                     | Activation energy | Ref. |
|----------------------------------------------------------------|-----------|-----------------------------------------|-------------------|------|
| Ir <sub>1</sub> /FeOx                                          | redox     | H* + H* → H <sub>2</sub> *              | 3.45              | 1    |
| Ir <sub>1</sub> /FeOx                                          | redox     | CO* + O* → CO <sub>2</sub> *            | 1.52              | 1    |
| Cu/α-MoC                                                       | carboxyl  | H <sub>2</sub> O* → H* + OH*            | 0.96              | 2    |
| CuB                                                            | carboxyl  | H <sub>2</sub> O* → H* + OH*            | 1.16              | 3    |
| Pt <sub>1</sub> /FeOx                                          | carboxyl  | H migration from O to Pt                | 1.29              | 4    |
| Cu (211)                                                       | carboxyl  | H <sub>2</sub> O* → H* + OH*            | 0.94              | 5    |
| Pt (111)                                                       | carboxyl  | H <sub>2</sub> O* → H* + OH*            | 0.88              | 6    |
| Au (100)                                                       | carboxyl  | H <sub>2</sub> O* → H* + OH*            | 1.53              | 7    |
| Cu <sub>29</sub>                                               | carboxyl  | H <sub>2</sub> O* → H* + OH*            | 0.93              | 7    |
| Au <sub>29</sub>                                               | carboxyl  | H <sub>2</sub> O* → H* + OH*            | 1.29              | 7    |
| Pt/TiO <sub>2</sub>                                            | redox     | CO <sub>2</sub> * → CO <sub>2</sub> (g) | 0.91              | 8    |
| Pt <sub>1</sub> @Ti <sub>3</sub> C <sub>2</sub> S <sub>2</sub> | redox     | OH* → H* + O*                           | 1.12              | 9    |
| aNi@TiO <sub>2-x</sub>                                         | redox     | H <sub>2</sub> O* → H* + OH*            | 0.35              | 10   |
| K/Cu (111)                                                     | carboxyl  | H <sub>2</sub> O* → H* + OH*            | 1.08              | 11   |
| K/Cu (100)                                                     | carboxyl  | H <sub>2</sub> O* → H* + OH*            | 1.06              | 11   |

#### References

1. J. X. Liang, J. Lin, J. Y. Liu, X. D. Wang, T. Zhang and J. Li, *Angew Chem Int*

- Edit*, 2020, **59**, 12868-12875.
2. X.-Y. Zou, L. Mi, Z.-J. Zuo, Z.-H. Gao and W. Huang, *Journal of Molecular Modeling*, 2020, **26**, 237.
  3. G. C. Zhao, J. S. Wang, Y. Q. Qiu and C. G. Liu, *Mol Catal*, 2020, **493**, 116046.
  4. S.-F. Wang, Y. Li, H. Wang, J.-X. Liang, C. Zhu and B. Qiao, *Nano Research*, 2024, **17**, 8627-8637.
  5. Z. Y. Li, N. Li, N. Wang, B. Zhou, P. Yin, B. Y. Song, J. Yu and Y. S. Yang, *Acs Omega*, 2022, **7**, 3514-3521.
  6. L. C. Grabow, A. A. Gokhale, S. T. Evans, J. A. Dumesic and M. Mavrikakis, *J Phys Chem C*, 2008, **112**, 4608-4617.
  7. P. Liu and J. A. Rodriguez, *J Chem Phys*, 2007, **126**, 164705.
  8. S. C. Ammal and A. Heyden, *Acs Catal*, 2017, **7**, 301-309.
  9. Y. Meng, H. Wang, J.-X. Liang, C. Zhu and J. Li, *Precision Chemistry*, 2024, **2**, 70-80.
  10. M. Xu, S. Yao, D. Rao, Y. Niu, N. Liu, M. Peng, P. Zhai, Y. Man, L. Zheng, B. Wang, B. Zhang, D. Ma and M. Wei, *J Am Chem Soc*, 2018, **140**, 11241-11251.
  11. Y. X. Wang and G. C. Wang, *Acs Catal*, 2019, **9**, 2261-2274.

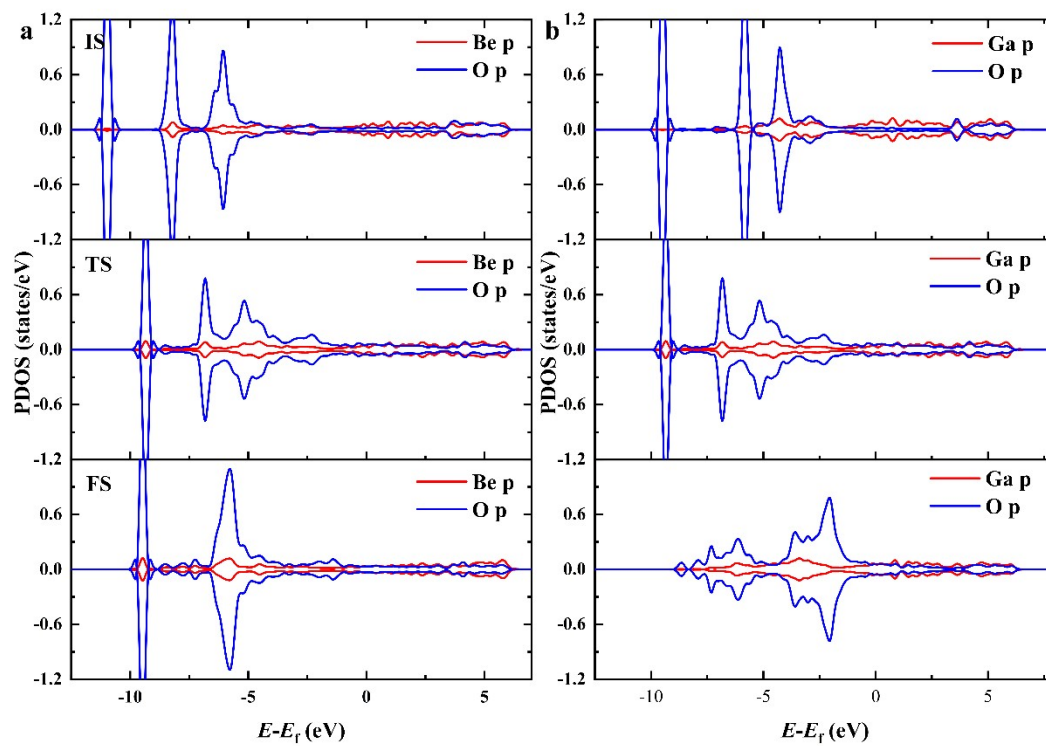

Figure S1. The PDOS plots for H<sub>2</sub>O adsorption states (IS), dissociation transition states (TS) and final states (FS) on the M<sub>1</sub>/Cu (111) (M = Be and Ga).

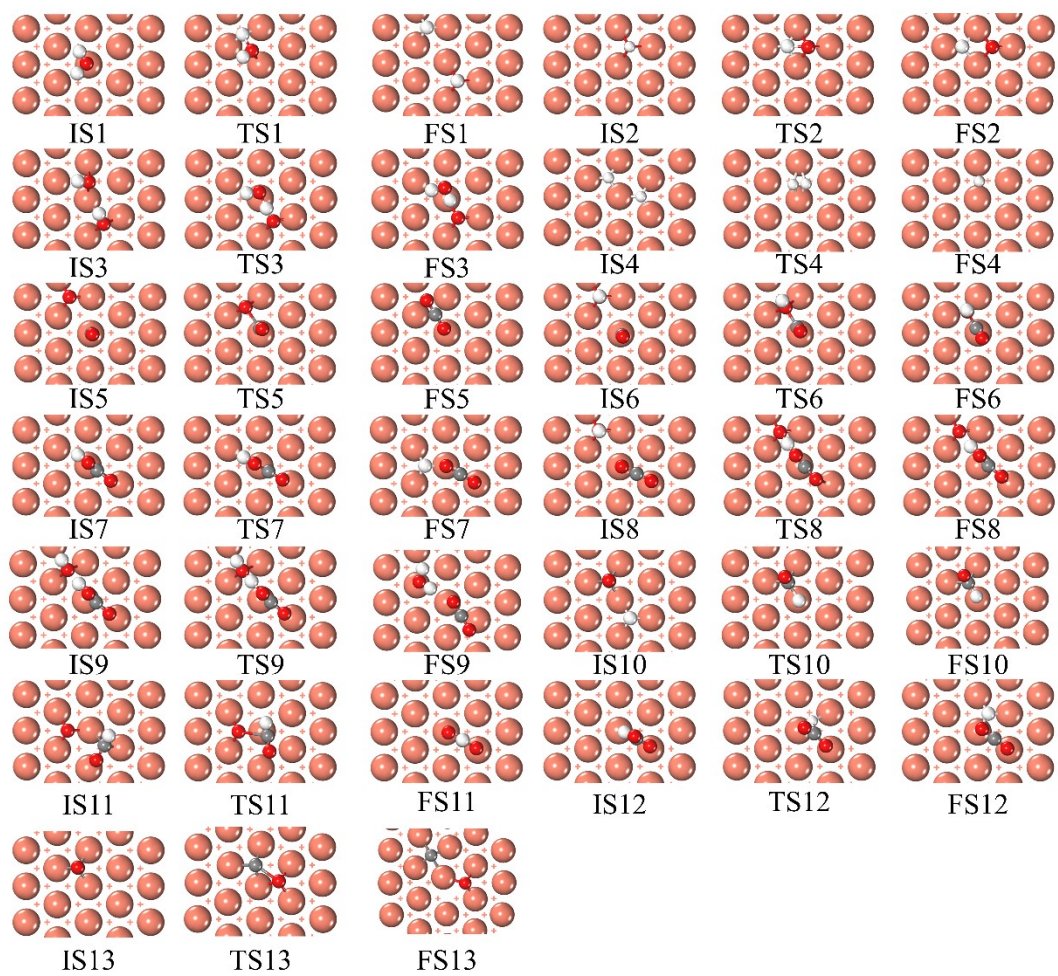

Figure S2. Initial state (IS), transition state (TS), final states (FS) of the reaction of each radical of WGS on Cu (111).

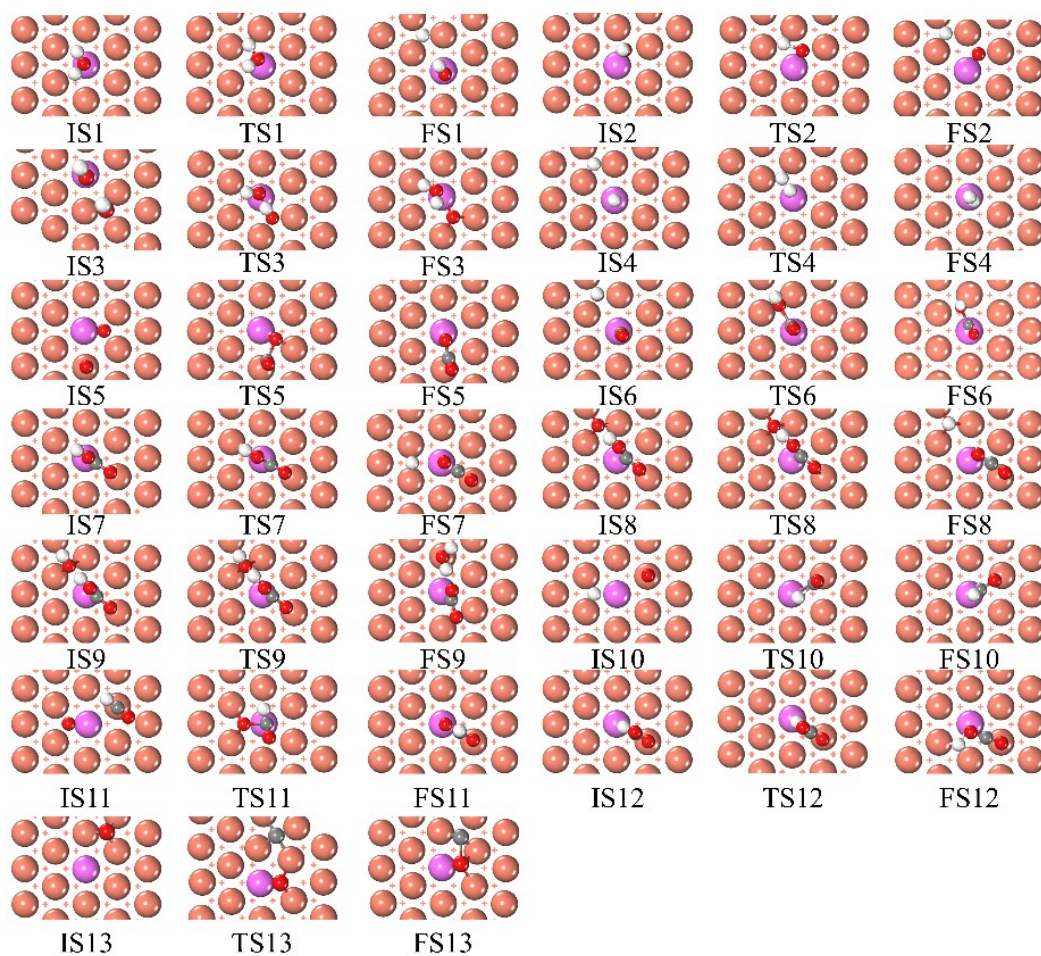

Figure S3. Initial state (IS), transition state (TS), final states (FS) of the reaction of each radical of WGSR on  $\text{Al}_1/\text{Cu}(111)$ .



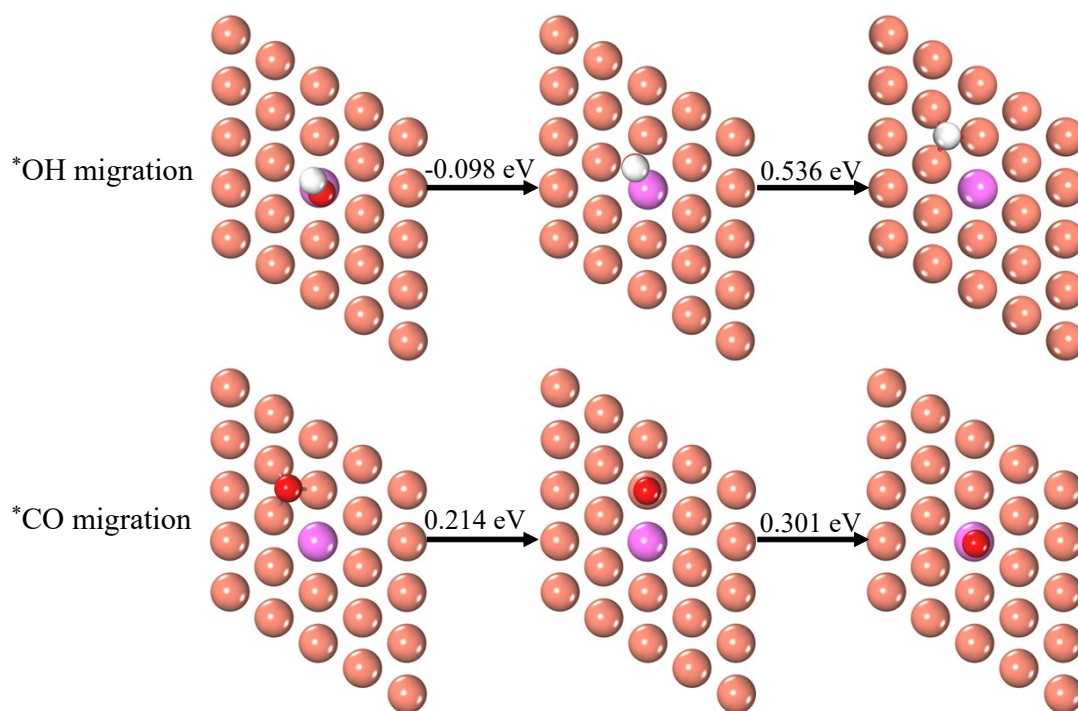

Figure S4. OH migration from the Al top site to the hollow site and CO migration from the Cu hollow site to the Al top site.
